# Supplementary material for: KCNN4 Promotes the Stemness Potentials of Liver Cancer Stem Cells by Enhancing Glucose Metabolism
Source: MDPI journal article supplement (doi:10.3390/ijms23136958), 2022-06-23
Supplement: s1 [file s1]

**Supplementary Table S1. *KCNN4* promoted *in vivo* tumor formation ability by increasing stem cell potentials.**

|                         | Tumor weight (g) |             |             | Tumor volume (mm <sup>3</sup> ) |                  |                | Median tumor incidence time (d) |         |          |
|-------------------------|------------------|-------------|-------------|---------------------------------|------------------|----------------|---------------------------------|---------|----------|
|                         | ov-KCNN4         | lv-ctrl     | sh-KCNN4    | ov-KCNN4                        | lv-ctrl          | sh-KCNN4       | ov-KCNN4                        | lv-ctrl | sh-KCNN4 |
| <b>2*10<sup>2</sup></b> | 0.026±0.008      | 0.010±0.006 | 0.000±0.000 | 24.560±8.443                    | 5.778±6.129      | 0.000±0.000    | 60±4                            | 70±4    | 75±0     |
| <b>2*10<sup>3</sup></b> | 0.021±0.082      | 0.059±0.014 | 0.004±0.001 | 180.170±59.800                  | 50.830±15.490    | 4.857±1.574    | 53±1                            | 55±1    | 71±2     |
| <b>2*10<sup>4</sup></b> | 0.761±0.239      | 0.372±0.108 | 0.072±0.027 | 702.600±205.900                 | 318.300±75.480   | 82.830±27.680  | 36±2                            | 42±2    | 54±1     |
| <b>2*10<sup>5</sup></b> | 2.413±0.573      | 7.389±0.214 | 0.515±0.089 | 2309.000±506.400                | 1329.000±202.500 | 491.800±90.210 | 25±3                            | 32±1    | 43±1     |

**Supplementary Table S2. *KCNN4* promoted *in vivo* tumor formation ability by enhancing CSC frequency.**

| Groups       | No. of injected cells |                   |                   |                   | CSC frequency | <i>P</i> -values  |
|--------------|-----------------------|-------------------|-------------------|-------------------|---------------|-------------------|
|              | 2*10 <sup>5</sup>     | 2*10 <sup>4</sup> | 2*10 <sup>3</sup> | 2*10 <sup>2</sup> |               |                   |
| (A) ov-KCNN4 | 9/9                   | 9/9               | 9/9               | 9/9               | 1/1           | A vs. B: 0.029    |
| (B) lv-ctrl  | 9/9                   | 9/9               | 9/9               | 6/9               | 1/182         | A vs. C: 2.31e-08 |
| (C) sh-KCNN4 | 9/9                   | 9/9               | 7/9               | 0/9               | 1/1629        | B vs. C: 0.000256 |

**Supplementary Table S3. Formulation of sphere culture medium.**

| <b>supplementary</b>                      | <b>concentration</b>                          | <b>Manufacture (Catalog)</b> |
|-------------------------------------------|-----------------------------------------------|------------------------------|
| DMEM/F12 base medium                      | 100ml                                         | Thermo (A4192001)            |
| Penicillin-Streptomycin                   | 100IU/ml Penicillin and 100ug/ml Streptomycin | Corning® (30-002-CI)         |
| L-glutamine                               | 2mm/l                                         | Corning® (25-005-CI)         |
| Non-Essential Amino Acids Solution (100X) | 1ml                                           | Thermo (11140050)            |
| B-27 supplement (50X), serum-free         | 2ml                                           | Gibco (17504-044)            |
| 2-mercaptoethanol                         | 75uM                                          | Gibco (21985023)             |
| N-2 supplementary liquid (100X)           | 1ml                                           | Gibco (17502001)             |
| EGF                                       | 20ng/ml                                       | Sigma (#E9644)               |
| Human Recombinant IGF-I, ACF              | 5U/L                                          | Stem Cell (#78142)           |
| Heparin solution                          | 0.96IU/ml                                     | Stem Cell (#07980)           |
| 15% glucose                               | 4ml                                           | Sigma(G7021)                 |

**Supplementary Table S4. sequence of primer, siRNA, and lentivirus**

| Gene                                 | primers        | sequence                   |                             |
|--------------------------------------|----------------|----------------------------|-----------------------------|
|                                      |                | Forward (5' to 3')         | Reverse (3' to 5')          |
| <b>Stemness transcription factor</b> | CD133          | TGGATGCAGACCTTGACAACGT     | ATACCTGCTACGACAGTCGTGGT     |
|                                      | CD90           | GACCCGTGAGACAAAGAAGC       | GCCCTCACACTTGACCAGTT        |
|                                      | Bmi1           | TGGAGAAGGAATGGTCCACTTC     | GTGAGGAAACTGTGGATGAGGA      |
|                                      | Oct4           | CTTGCTGCAGAAAGTGGGTGGAGGAA | CTGCAGTGTGGGTTTCGGGCA       |
|                                      | Sox2           | GCCGAGTGGAAACTTTTGTCG      | GGCAGCGTGTACTTATCCTTCT      |
|                                      | Nanog          | AATACCTCAGCCTCCAGCAGATG    | TGCGTCACACCATTGCTATTCTTC    |
|                                      | $\beta$ -actin | CCTGGCACCCAGCACAAAT        | GGGCCGGACTCGTCATAC          |
| <b>KCNN4</b>                         | KCNN4-1        | TGCTCAACGCTTCCTACCGCAGCAT  | CTCTCGGCCACGGACAGCACCCA     |
|                                      | KCNN4-2        | TAACAAGGCAGAGAAGCACG       | CCTTCCTGCGAGTATGTTTGTA      |
| <b>TCA</b>                           | PDHK           | TTGGCTGGATTTGGTTATGGT      | CTTCAGGCGTGGTCTTGTAATG      |
|                                      | PDHA           | AACCCACAGACCATCTCATCA      | CCTTCCCTTTAGCACAAACCTC      |
|                                      | PDHB           | TGGAGAAGAAGTTGCCCAGTATG    | ACCAGCCATAGCTGCACCTA        |
| <b>Glycolysis</b>                    | LDHA           | GATTCAGCCCGATTCCGTTAC      | GAGTCCAATAGCCCAGGATGTG      |
|                                      | GLUT1          | TCACTGTGCTCCTGGTTCTGTTC    | GCTCCTCGGGTGTCTTGTC         |
|                                      | HK2            | GCCCGCCAGAAGACATTAGA       | CCTTGCTCAGACCTCGCTCC        |
|                                      | PFK1           | GGAGGAACACCTTTGTCGCC       | GTCAAAGGCTGATGGCGTCC        |
|                                      | PKM            | GCTTCTGACCCCATCCTCTACC     | CGTTATCCAGCGTGATTTTGAG      |
| <b>Mitochondrial biosynthesis</b>    | TFAM           | TAGGGCGGAGTGGCAGGTA        | TTCTTCCCAAGACTTCATTTTCATTAT |
|                                      | PGC1 $\alpha$  | AAAGGATGCGCTCTCGTTCA       | CTTCAGCCTCTCGTGCTGAT        |
|                                      | NRF1           | CAGGCGGTGGCATCGTT          | GCGGTTTCCCCAGACAAGAC        |

|                               |                             |                                                |
|-------------------------------|-----------------------------|------------------------------------------------|
| <b>siRNA-seq (Genephrama)</b> | si-KCNN4-858(5' to 3')      | GGAAGCUGGAGUUUAACAATT<br>UUGUAAAACUCCAGCUUCCTT |
|                               | si-KCNN4-1083(5' to 3')     | GGGAACAAGUGAACUCCAUTT<br>AUGGAGUUCACUUGUUCCTT  |
|                               | si-KCNN4-963(5' to 3')      | CCUGGAUGUUCUACAAACATT<br>UGUUUGUAGAACAUCAGGTT  |
|                               | negative control (5' to 3') | UUCUCCGAACGUGUCACGUTT                          |
|                               |                             | ACGUGACACGUUCGGAGCATT                          |

|                   |                                      |                                                  |
|-------------------|--------------------------------------|--------------------------------------------------|
| <b>lentivirus</b> | ov-KCNN4(PCR primers of target gene) | AGGTCGACTCTAGAGATCCCGCCACCATGGGCGGGGATCTG<br>GTG |
|                   | lv-ctrl                              | CTTCCATGGTGGCGACCGGCTTGGACTGCTGGCTGGGTTCTG       |
|                   | sh-KCNN4-1                           | TTCTCCGAACGTGTCACGT                              |
|                   | sh-KCNN4-2                           | CAAGATGCACATGATCCTGTA                            |
|                   | sh-KCNN4-3                           | GCCTGGATGTTCTACAAACAT                            |
|                   | sh-ctrl                              | CGCTCTCAATCAAGTCCGCTT                            |
